# Supplementary material for: Chili Pepper AN2 (CaAN2): A Visible Selection Marker for Nondestructive Monitoring of Transgenic Plants
Source: MDPI journal article supplement (doi:10.3390/plants11060820), 2022-03-19
Supplement: s1 [file s1]

**Supplementary Table S1.** Anthocyanin-related R2R3-MYB regulators from various species

| R2R3 regulator | Species                         | Accession number |
|----------------|---------------------------------|------------------|
| AmROS1         | <i>Antirrhinum majus</i>        | ABB83826         |
| AtPAP1         | <i>Arabidopsis thaliana</i>     | AAG42001         |
| AtTT2          | <i>Arabidopsis thaliana</i>     | CAC40021         |
| BoTT2          | <i>Brassica oleracea</i>        | ADP76653.1       |
| CmMYB6         | <i>Chrysanthemum morifolium</i> | KR002097.1       |
| DpMYB1         | <i>Dahlia pinnata</i>           | AB601003         |
| GmMYB10        | <i>Garcinia mangostana</i>      | ACM62751.1       |
| GhMYB10        | <i>Gerbera hybrida</i>          | CAD87010         |
| InMYB1         | <i>Ipomoea nil</i>              | BAE94391         |
| LhMYB6         | <i>Lilium hybrida</i>           | BAJ05399         |
| MdMYB10        | <i>Malus × domestica</i>        | ACQ45201         |
| NtAN2          | <i>Nicotiana tabacum</i>        | ACO52470.1       |
| OsC1           | <i>Oryza sativa</i>             | BAD04024         |
| PhAN2          | <i>Petunia × hybrida</i>        | AAF66727         |
| RsMYB1         | <i>Raphanus sativus</i>         | AKM95888.1       |
| SIANT1         | <i>Solanum lycopersicum</i>     | AAQ55181.1       |
| TaPpm1         | <i>Triticum aestivum</i>        | MG066451         |
| ZmC1           | <i>Zea mays</i>                 | AAA33482         |
| ZmPL           | <i>Zea mays</i>                 | AAA19819         |

**Supplementary Table S2.** List of primers used in this study.

| Usage           | Primer name   | Primer sequence (5'-3')   |
|-----------------|---------------|---------------------------|
| Gene expression | qRT-CaAN2-F   | AGATTGCCGGAAGAAGCAAAAC    |
|                 | qRT-CaAN2-R   | TTGCACTTGATGAGAAGGTCCGAG  |
|                 | qRT-CaTT8-F   | GCCAAAATTCAGACAGTGGT      |
|                 | qRT-CaTT8-R   | TCTTCTTCGTGCTCTTCGTT      |
|                 | qRT-CaPAL-F   | ATTGATTTTTGCAAGAAATCAATTC |
|                 | qRT-CaPAL-R   | GCTCCACTTTAGCCCCAC        |
|                 | qRT-CaC4H-F   | GATTCCTTCCATTCGGTGTT      |
|                 | qRT-CaC4H-R   | CCTTTCTCCGTGGTGTCG        |
|                 | qRT-Ca4CL-F   | CTGGACCAGTGCTGGCAAT       |
|                 | qRT-Ca4CL-R   | GGTTACGGGGCAAAGAACAA      |
|                 | qRT-CaCHS-F   | GTGGAACCGTTATCCGACTAGCAA  |
|                 | qRT-CaCHS-R   | GTATCACTTGGGCCACGGAAAGTA  |
|                 | qRT-CaCHI-F   | CCTCCTGGTTCTACACCACC      |
|                 | qRT-CaCHI-R   | CTTTGCGGCAGGTGAAACTC      |
|                 | qRT-CaF3H-F   | ACGCTGATCATCAAGCAGTG      |
|                 | qRT-CaF3H-R   | CTGAAGAGGTTGCCGAAAAG      |
|                 | qRT-CaDFR-F   | CAAGGCAGAGGGAAGATTCA      |
|                 | qRT-CaDFR-R   | TCTGTCGGCAAGTCTCAATG      |
|                 | qRT-CaANS-F   | CAAATGCCCACAACCAGAACTAGC  |
|                 | qRT-CaANS-R   | CGCACTTTGCAGTTACCCACTTTC  |
|                 | qRT-CaUFGT-F  | CCTGAGAGTCATGTACATGGAGG   |
|                 | qRT-CaUFGT-R  | TCCAATAATTCTAGTTCCTCGG    |
|                 | qRT-CaACTIN-F | CCACCTCTTCACTCTCTGCTCT    |
|                 | qRT-CaACTIN-R | ACTAGGAAAAACAGCCCTTGGT    |
|                 | qRT-NtPAL-F   | ATTGAGGTCATCCGTTCTGC      |
|                 | qRT-NtPAL-R   | ACCGTGTAACGCCTTGTTTC      |
|                 | qRT-Nt4CL-F   | TCATTGACGAGGATGACGAG      |
|                 | qRT-Nt4CL-R   | TGGGATGGTTGAGAAGAAGG      |

|              |               |                                    |
|--------------|---------------|------------------------------------|
|              | qRT-NtCHS-F   | TTGTTCGAGCTTGTCTCTGC               |
|              | qRT-NtCHS-R   | AGCCCAGGAACATCTTTGAG               |
|              | qRT-NtCHI-F   | GTCAGGCCATTGAAAAGCTC               |
|              | qRT-NtCHI-R   | CTAATCGTCAATGCCCCAAC               |
|              | qRT-NtF3H-F   | CAAGGCATGTGTGGATATGG               |
|              | qRT-NtF3H-R   | TGTGTCGTTTCAGTCCAAGG               |
|              | qRT-NtF3'H-F  | AGGCTCAACACTTCTCGT                 |
|              | qRT-NtF3'H-R  | CATCAACTTTGGGCTTCT                 |
|              | qRT-NtDFR-F   | AACCAACAGTCAGGGGAATG               |
|              | qRT-NtDFR-R   | TTGGACATCGACAGTTCCAG               |
|              | qRT-NtANS-F   | TGGCGTTGAAGCTCATACTG               |
|              | qRT-NtANS-R   | GGAATTAGGCACACACTTTGC              |
|              | qRT-NtUFGT-F  | CAATGTTTGGGATGGTGTCA               |
|              | qRT-NtUFGT-R  | TCCTCCTCTGCCTCTTTCA                |
|              | qRT-NtAN2-F   | GTAGACTTCCTGGAAGGACGGCAA           |
|              | qRT-NtAN2-R   | GGCCGAGGTCTGAATATGGTGATC           |
|              | qRT-NtAN1-F   | CTTGAACACTTCTCAAACCGA              |
|              | qRT-NtAN1-R   | TGCTAGGGCACAATGTGAAG               |
|              | qRT-NtMYB3-F  | CCGGGGAGAACTGATAATGA               |
|              | qRT-NtMYB3-R  | TTTCTGGCCAAAACCTCAAGG              |
|              | qRT-NtETC1-F  | TCCTCCTGATTCTCAAGGAAA              |
|              | qRT-NtETC1-R  | TCCGGGTATTCTTCCAGCTA               |
|              | qRT-NtGAPDH-F | GGTGTCCACAGACTTCGTGG               |
|              | qRT-NtGAPDH-R | GACTCCTCACAGCAGCACCA               |
| Gene cloning | CaAN2-F       | ATGAATACTGCTATTATTGCCAAGTCCTCTG    |
|              | CaAN2-R       | CTAATTAAGTAGATTCCATAGGCCAATATCAG   |
|              | pDONR-CaAN2-F | AAAAAAGCAGGCTCCATGAATACTGCTATTATTG |
|              | pDONR-CaAN2-R | GTACAAGAAAGCTGGGTCCTAATTAAGTAGATTC |
